# Supplementary material for: Spatio-temporal gait variables predicted incident disability
Source: PubMed Central journal article supplement (PMC6993362; doi:10.1186/s12984-020-0643-4), 2020-01-30
Supplement: 12984_2020_643_MOESM1_ESM.pdf [file 12984_2020_643_MOESM1_ESM.pdf]

Table S1. Correlation coefficients among gait variables.

|                           |          | Gait speed | Stride length | Cadence | Stride length variability |
|---------------------------|----------|------------|---------------|---------|---------------------------|
| Gait speed                | <i>r</i> | -          | -             | -       | -                         |
|                           | <i>P</i> | -          | -             | -       | -                         |
| Stride length             | <i>r</i> | 0.846      | -             | -       | -                         |
|                           | <i>P</i> | < .001     | -             | -       | -                         |
| Cadence                   | <i>r</i> | 0.620      | 0.150         | -       | -                         |
|                           | <i>P</i> | < .001     | < .001        | -       | -                         |
| Stride length variability | <i>r</i> | -0.366     | -0.389        | -0.140  | -                         |
|                           | <i>P</i> | < .001     | < .001        | < .001  | -                         |

Values were Pearson's correlation coefficients and p values.
